# Supplementary material for: Effects of Allicin on Pathophysiological Mechanisms during the Progression of Nephropathy Associated to Diabetes
Source: MDPI journal article supplement (doi:10.3390/antiox9111134), 2020-11-15
Supplement: s1 [file s1]

Supplementary Figure

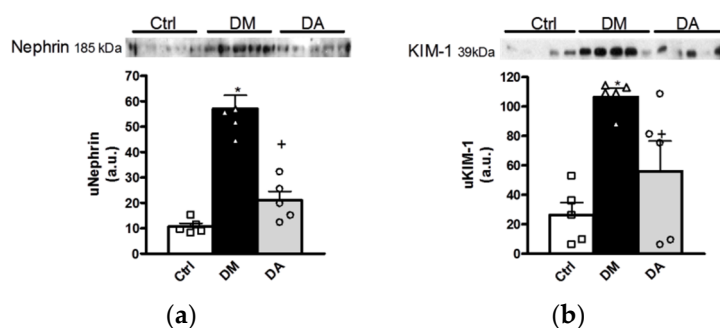

**Figure S1.** Urinary excretion of (a) Nephlin and (b) KIM-1. Ctrl: Control; DM: Diabetes; DA: Diabetes treated with allicin. a.u.; arbitrary units. Values are expressed as mean  $\pm$  SEM of 5 animals from each experimental group \*  $p < 0.05$  vs Ctrl, +  $p < 0.05$  vs DM.
